# Supplementary material for: Dlf1, a WRKY Transcription Factor, Is Involved in the Control of Flowering Time and Plant Height in Rice
Source: PubMed Central journal article supplement (PMC4103817; doi:10.1371/journal.pone.0102529), 2014-07-18

**(A) Cell size**

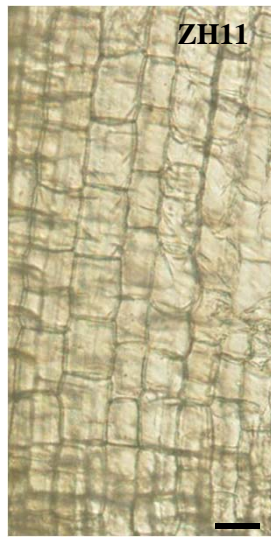

$(82.5 \pm 9.35 \mu\text{m}) \times (55.8 \pm 2.04 \mu\text{m})$

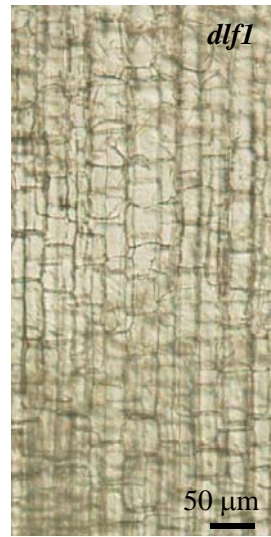

$(59.5 \pm 5.99 \mu\text{m}) \times (46 \pm 4.59 \mu\text{m})$

**(B) Number of spikelets per panicle**

Zhonghua11:  $294.9 \pm 13.3$  ; *dlf1* mutant:  $189.3 \pm 22.3$

**(C) 1000-grain weight**

Zhonghua11:  $28.83 \pm 0.12 \text{ g}$  ; *dlf1* mutant:  $20.13 \pm 0.17 \text{ g}$

**(D)**

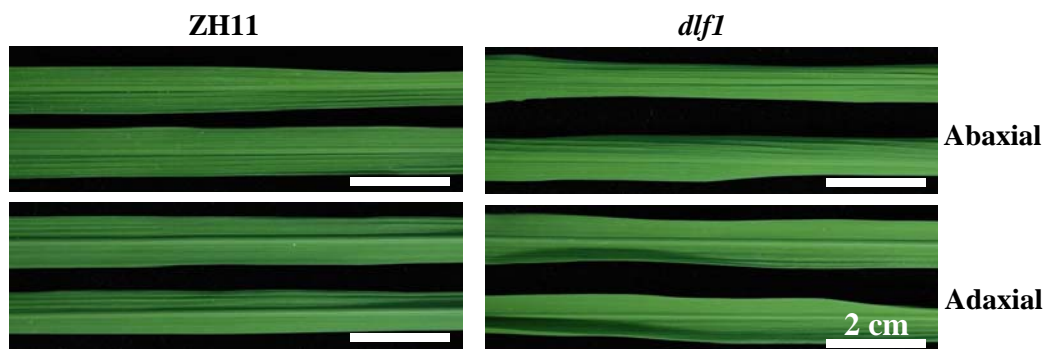

**(E)**

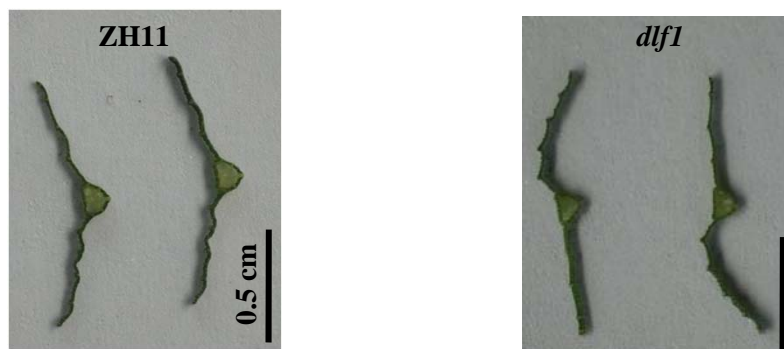

Supplement: pone.0102529.s001.pdf [file pone.0102529.s001.pdf]
