# Supplementary material for: Dlf1, a WRKY Transcription Factor, Is Involved in the Control of Flowering Time and Plant Height in Rice
Source: PubMed Central journal article supplement (PMC4103817; doi:10.1371/journal.pone.0102529), 2014-07-18
Supplement: pone.0102529.s003.pdf [file pone.0102529.s003.pdf]

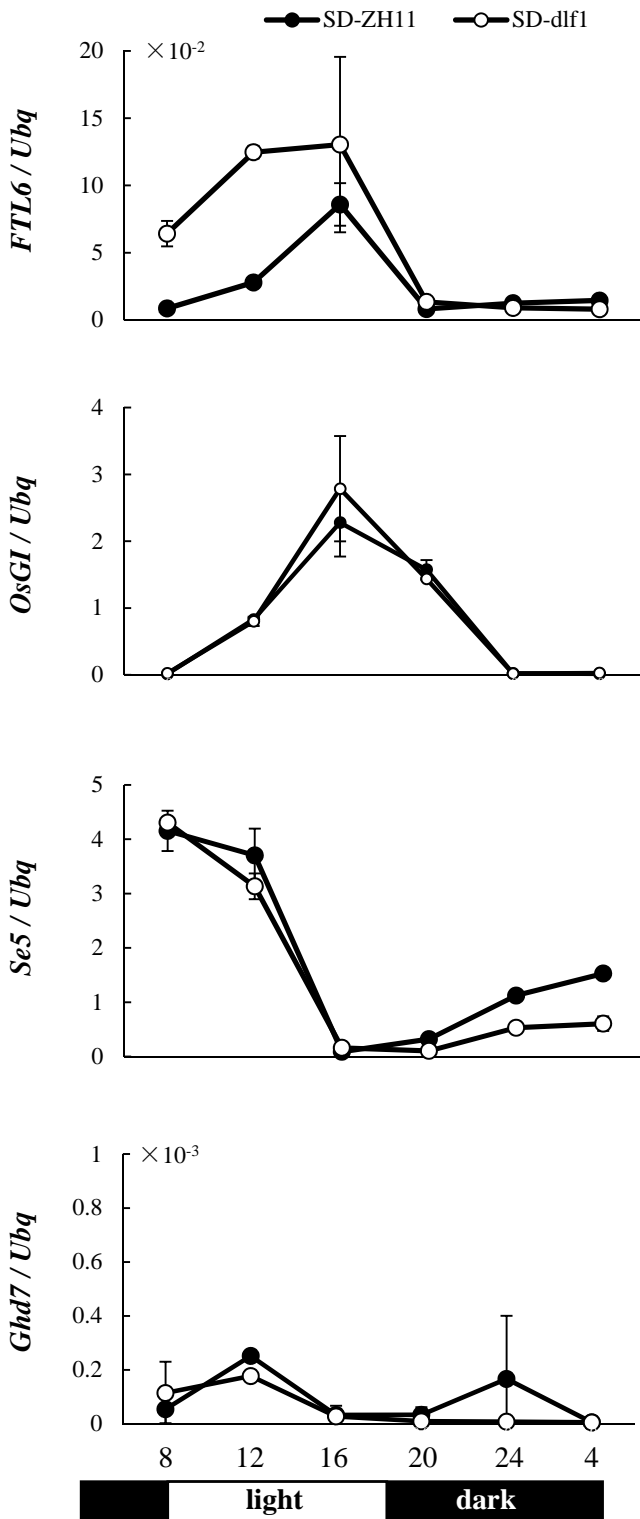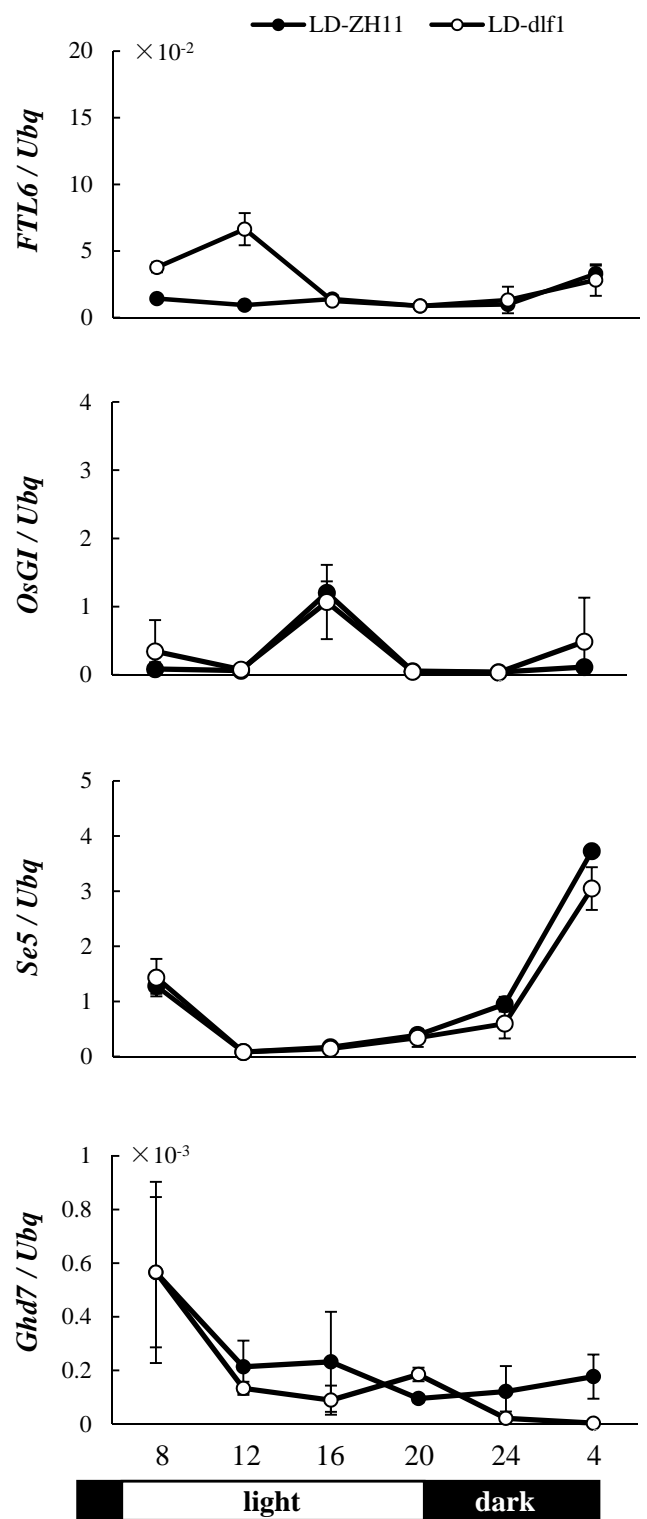

Supplemental Figure S3
